# Supplementary material for: Blood-Based Markers for Skeletal and Cardiac Muscle Function in Eventing Horses before and after Cross-Country Rides and How They Are Influenced by Plasma Volume Shift
Source: MDPI journal article supplement (doi:10.3390/ani13193110), 2023-10-05
Supplement: s1 [file s1]

# Blood-Based Markers for Skeletal and Cardiac Muscle Function in Eventing Horses before and after Cross-Country Rides and How They Are Influenced by Plasma Volume Shift

Johanna Giers <sup>1,\*</sup>, Alexander Bartel <sup>2</sup>, Katharina Kirsch <sup>3</sup>, Simon Franz Müller <sup>4</sup>, Stephanie Horstmann <sup>5</sup> and Heidrun Gehlen <sup>1</sup>

**Table S1.** Blood-based biomarkers with reference ranges, units and median (25th/ 75th quantiles) per sampled time point.

| Parameter        | N   | Missing | Reference range | Unit                 | Median (25th,75th)  |                     |                     |                     |
|------------------|-----|---------|-----------------|----------------------|---------------------|---------------------|---------------------|---------------------|
|                  |     |         |                 |                      | Pre (n=55)          | 10 min (n=55)       | 30 min (n=55)       | next morning (n=54) |
| Albumin          | 162 | 2       | 25 - 54         | g/l                  | 33.9 (32.5;35.5)    | 37.1 (35.4;39.1)    | 36.1 (34.6;38.1)    | 34.2 (33.0;35.6)    |
| AST              | 162 | 2       | < 250           | U/l                  | 169.8 (131.8;309.0) | n.m.                | 186.2 (144.5;338.8) | 182.0 (141.3;323.6) |
| Calcium          | 162 | 2       | 2.5 - 3.4       | mmol/l               | 3.0 (3.0;3.1)       | n.m.                | 3.1 (3.1;3.2)       | 3.1 (3.0;3.1)       |
| Chloride         | 162 | 2       | 95 - 105        | mmol/l               | 100 (98;101)        | n.m.                | 99 (96;100)         | 100 (99;101)        |
| CK               | 162 | 2       | < 190           | U/l                  | 115 (74;196)        | n.m.                | 172 (106;269)       | 158 (95;222)        |
| Creatinine       | 162 | 2       | 71 - 159        | µmol/l               | 94 (85;104)         | n.m.                | 125 (115;134)       | 103 (88;112)        |
| cTnI             | 162 | 2       | < 0.03          | ng/ml                | 0.01 (0.01;0.02)    | n.m.                | 0.02 (0.02;0.03)    | 0.04 (0.02;0.07)    |
| HCT              | 164 | 0       | 30.0 - 40.0     | %                    | 36.8 (34.3;38.9)    | 54.4 (50.6;57.3)    | 47.3 (44.2;49.3)    | 36.7 (34.8;38.7)    |
| Inorg. Phosphate | 162 | 2       | 0.7 - 1.5       | mmol/l               | 1.1 (0.9;1.3)       | n.m.                | 0.8 (0.7;1.0)       | 1.1 (1.0;1.2)       |
| Lactate          | 130 | 34      | < 0.9           | mmol/l               | 0.67 (0.58;0.76)    | 8.81 (5.45;15.14)   | 3.21 (1.93;5.42)    | 0.70 (0.64;0.88)    |
| LDH              | 162 | 2       | < 400           | U/l                  | 377.3 (270.7;413.0) | n.m.                | 436.0 (376.8;493.2) | 417.1 (337.9;477.2) |
| Magnesium        | 162 | 2       | 0.5 - 0.9       | mmol/l               | 0.8 (0.7;0.8)       | n.m.                | 0.7 (0.7;0.8)       | 0.7 (0.7;0.8)       |
| Potassium        | 162 | 2       | 2.8 - 4.5       | µg/l                 | 3.5 (3.0;3.8)       | n.m.                | 3.5 (3.2;3.7)       | 3.6 (3.1;3.8)       |
| RBC              | 164 | 0       | 6.40 - 10.40    | ×10 <sup>12</sup> /L | 7.73 (7.37;8.12)    | 10.97 (10.40;11.67) | 9.63 (9.12;10.27)   | 7.98 (7.73;8.25)    |
| SDMA             | 162 | 2       | < 0.75          | µmol/l               | 0.39 (0.34;0.42)    | 0.43 (0.37;0.49)    | 0.42 (0.38;0.49)    | 0.38 (0.31;0.43)    |
| Sodium           | 162 | 2       | 125 - 150       | mmol/l               | 138 (137;139)       | n.m.                | 139 (138;141)       | 139 (137;140)       |
| TP               | 162 | 2       | 55 - 75         | g/l                  | 61.0 (59.3;64.0)    | 67.4 (63.9;69.3)    | 64.6 (62.7;66.4)    | 61.8 (59.1;64.3)    |
| UREA             | 162 | 2       | 3.3 - 6.7       | mmol/l               | 4.8 (4.2;5.5)       | 5.2 (4.7;5.8)       | 5.4 (4.7;5.9)       | 5.3 (4.6;5.8)       |

\* Parameters in an alphabetical order; n.m. = not measured; The reference ranges given for the individual parameters were provided by the evaluating laboratory for the specific test used.

**Table S2.** Blood-based biomarkers with reference ranges, units and estimated mean from the mixed model (95 % confidence interval) per time point for unadjusted values.

| Parameter        | Reference range | Unit                 | EMM + 95 % confidence interval |                     |                     |                     |
|------------------|-----------------|----------------------|--------------------------------|---------------------|---------------------|---------------------|
|                  |                 |                      | Pre (n=55)                     | 10 min (n=55)       | 30 min (n=55)       | next morning (n=54) |
| Albumin          | 25 - 54         | g/l                  | 34.0 (32.9;35.2)               | 37.5 (36.3;38.6)    | 36.4 (35.3;37.6)    | 34.4 (33.3;35.6)    |
| AST              | < 250           | U/l                  | 229 (178;295)                  | n.m.                | 251 (195;316)       | 240 (186;309)       |
| Calcium          | 2.5 - 3.4       | mmol/l               | 3.0 (3.0;3.1)                  | n.m.                | 3.1 (3.1;3.2)       | 3.0 (3.0;3.1)       |
| Chloride         | 95 - 105        | mmol/l               | 100 (99;101)                   | n.m.                | 99 (97;100)         | 100 (100;102)       |
| CK               | < 190           | U/l                  | 132 (102;170)                  | n.m.                | 191 (148;245)       | 166 (129;219)       |
| Creatinine       | 71 - 159        | µmol/l               | 95 (88;102)                    | n.m.                | 124 (117;131)       | 99 (93;106)         |
| cTnI             | < 0.03          | ng/ml                | 0.02 (0.01;0.04)               | n.m.                | 0.03 (0.01;0.05)    | 0.07 (0.04;0.09)    |
| HCT              | 30.0 - 40.0     | %                    | 36.4 (34.8;38.0)               | 54.3 (52.7;56.0)    | 46.6 (45.0;48.3)    | 36.5 (34.9;38.2)    |
| Inorg. Phosphate | 0.7 - 1.5       | mmol/l               | 1.1 (1.0;1.2)                  | n.m.                | 0.8 (0.7;1.0)       | 1.1 (1.0;1.2)       |
| Lactate          | < 0.9           | mmol/l               | 0.7 (0.5;0.9)                  | 9.4 (7.4;12.0)      | 3.7 (2.9;4.8)       | 0.7 (0.6;0.9)       |
| LDH              | < 400           | U/l                  | 363 (321;405)                  | n.m.                | 437 (395;479)       | 418 (376;460)       |
| Magnesium        | 0.5 - 0.9       | mmol/l               | 0.7 (0.7;0.8)                  | n.m.                | 0.7 (0.7;0.7)       | 0.7 (0.7;0.8)       |
| Potassium        | 2.8 - 4.5       | µg/l                 | 3.3 (3.1;3.6)                  | n.m.                | 3.5 (3.3;3.7)       | 3.4 (3.2;3.6)       |
| RBC              | 6.40 - 10.40    | x10 <sup>12</sup> /L | 7.70 (7.41;7.98)               | 11.03 (10.74;11.31) | 9.65 (9.36;9.94)    | 7.88 (7.59;8.17)    |
| SDMA             | < 0.75          | µmol/l               | 0.377 (0.349;0.406)            | 0.422 (0.393;0.450) | 0.430 (0.401;0.458) | 0.370 (0.341;0.398) |
| Sodium           | 125 - 150       | mmol/l               | 138 (137;139)                  | n.m.                | 139 (138;140)       | 138 (137;140)       |
| TP               | 55 - 75         | g/l                  | 62.0 (60.6;63.5)               | 67.4 (65.9;68.9)    | 65.4 (63.9;66.9)    | 62.4 (60.9;63.9)    |
| UREA             | 3.3 - 6.7       | mmol/l               | 4.99 (4.53;5.46)               | 5.38 (4.91;5.84)    | 5.44 (4.97;5.91)    | 5.30 (4.83;5.77)    |

\* Parameters in an alphabetical order; n.m. = not measured; The reference ranges given for the individual parameters were provided by the evaluating laboratory for the specific test used.
